# Supplementary material for: Emerging investigator series: metal nanoparticles in freshwater: transformation, bioavailability and effects on invertebrates
Source: Royal Society of Chemistry journal article supplement (doi:10.1039/d2en00052k), 2022-01-01
Supplement: d2en00052k1.pdf [file d2en00052k1.pdf]

## Supplementary Information

### **Emerging investigator series: Metal nanoparticles in the freshwater: transformation, bioavailability and effects on invertebrates**

Wang Ting and Wei LIU\*

University of Geneva, Faculty of Sciences, Earth and Environment Sciences. Switzerland

\* Corresponding author; Email: [wei.liu@unige.ch](mailto:wei.liu@unige.ch)

Address: Department F.-A. Forel for Environmental and  
Aquatic Sciences, Uni Carl Vogt, 66 Blvd Carl-Vogt, CH 1211  
Geneva, Switzerland

**FIGURE**

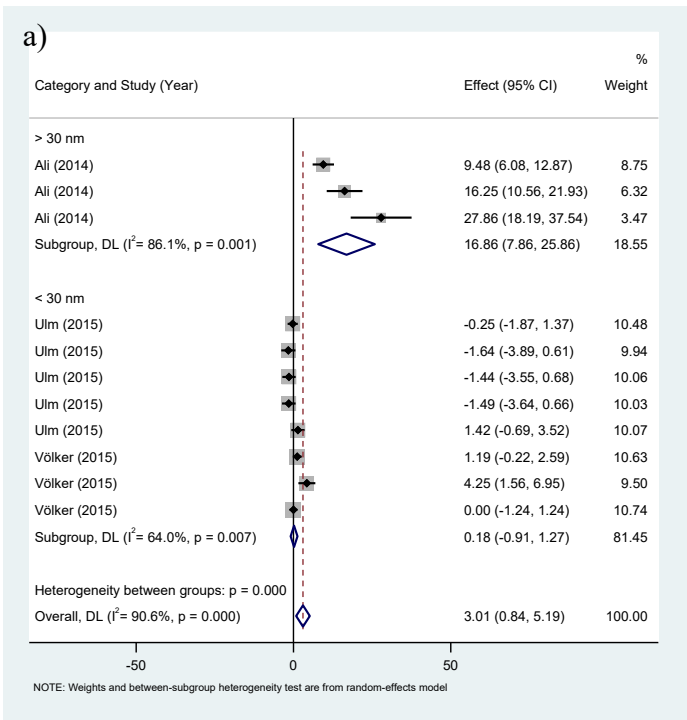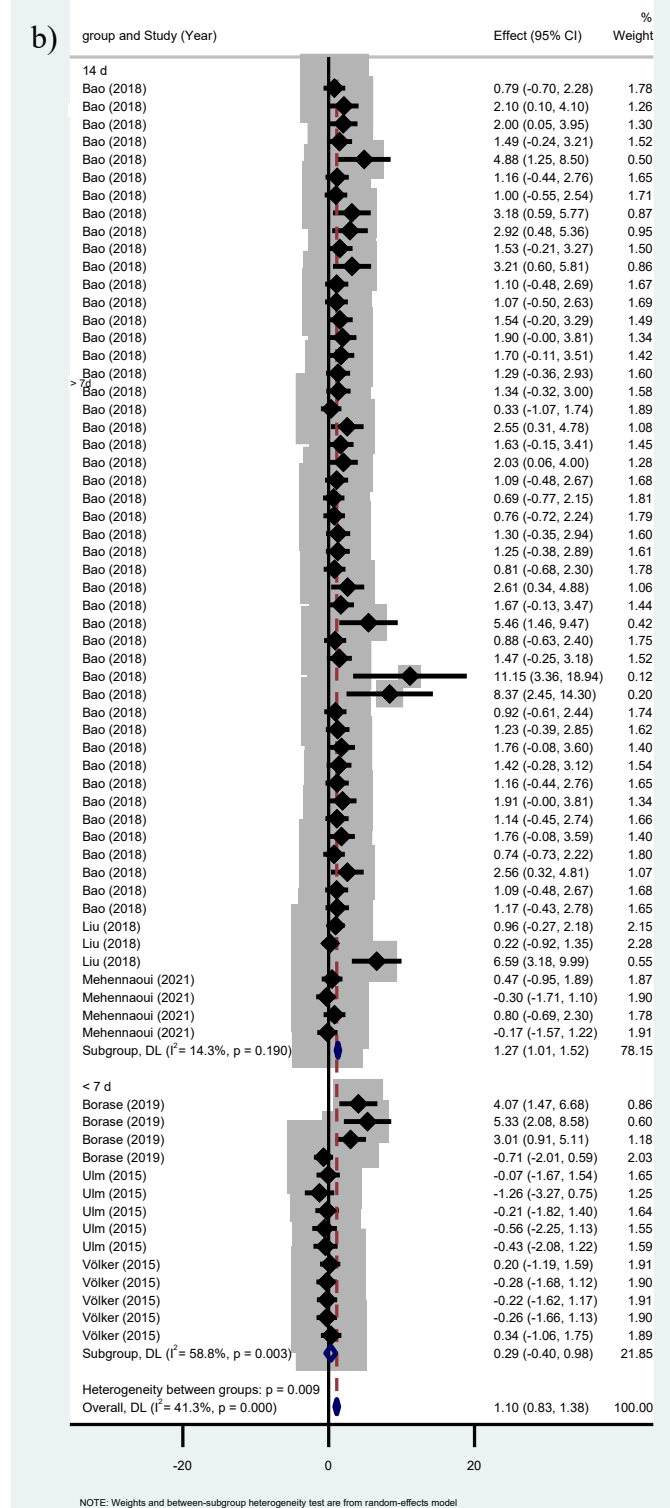

c)

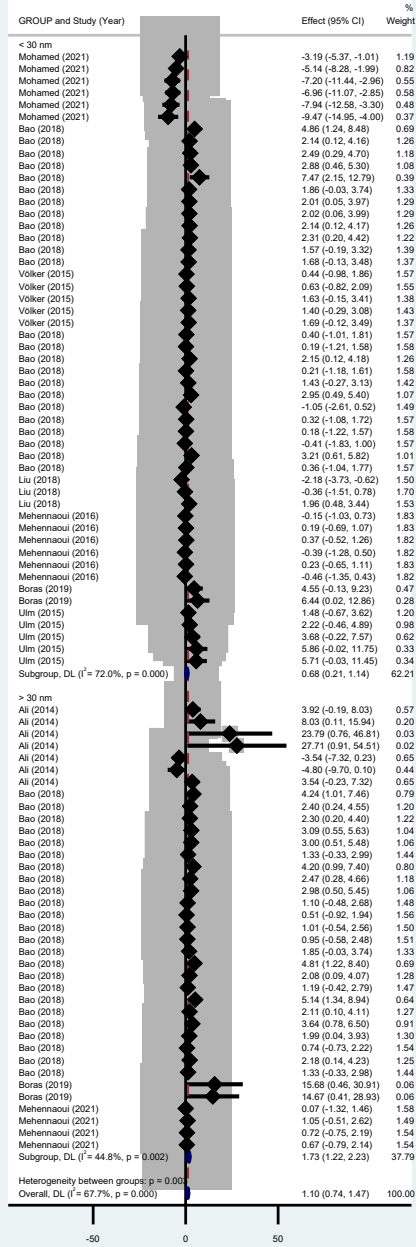

NOTE: Weights and between-subgroup heterogeneity test are from random-effects model

d)

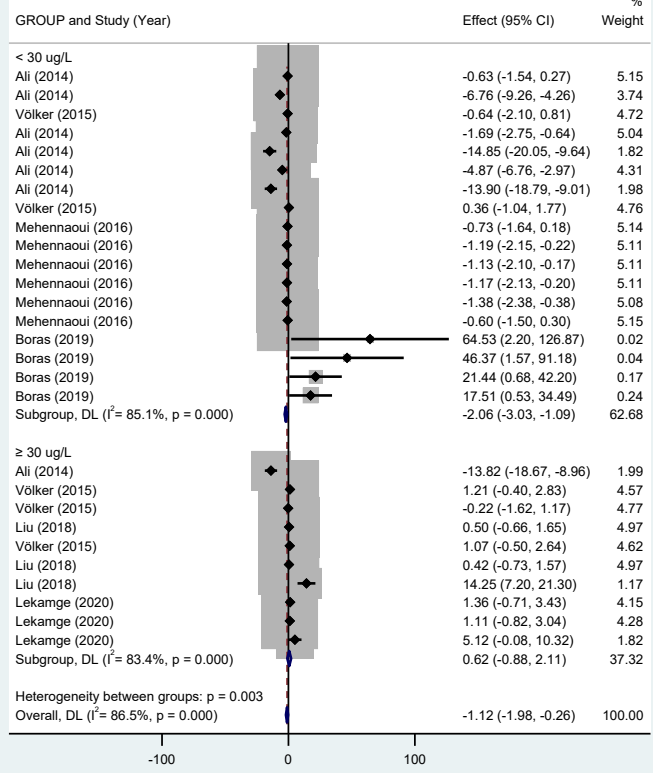

NOTE: Weights and between-subgroup heterogeneity test are from random-effects model

e)

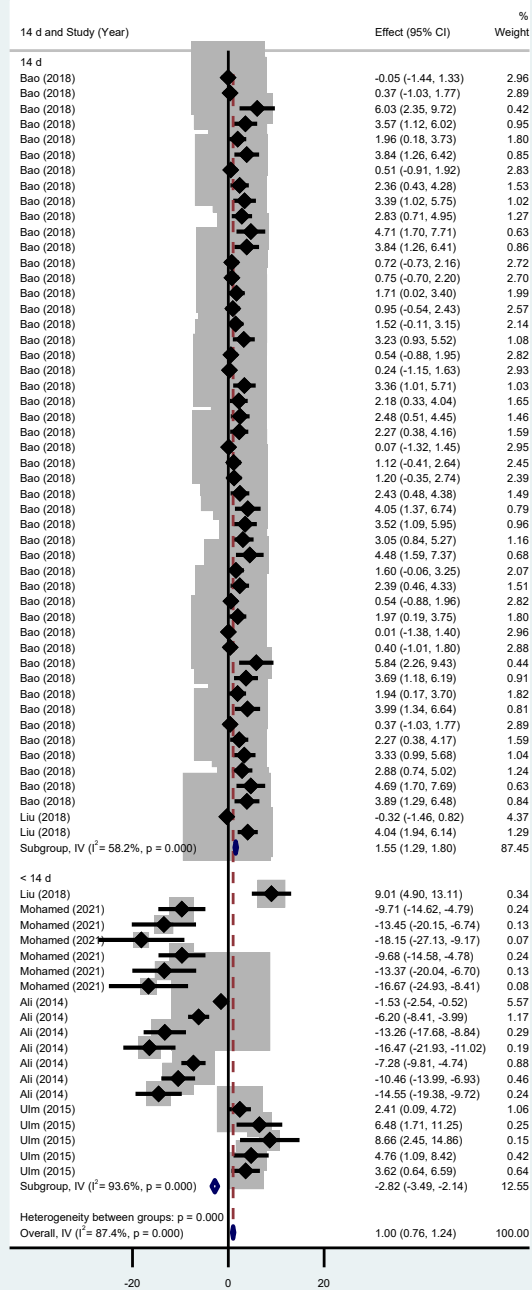

f)

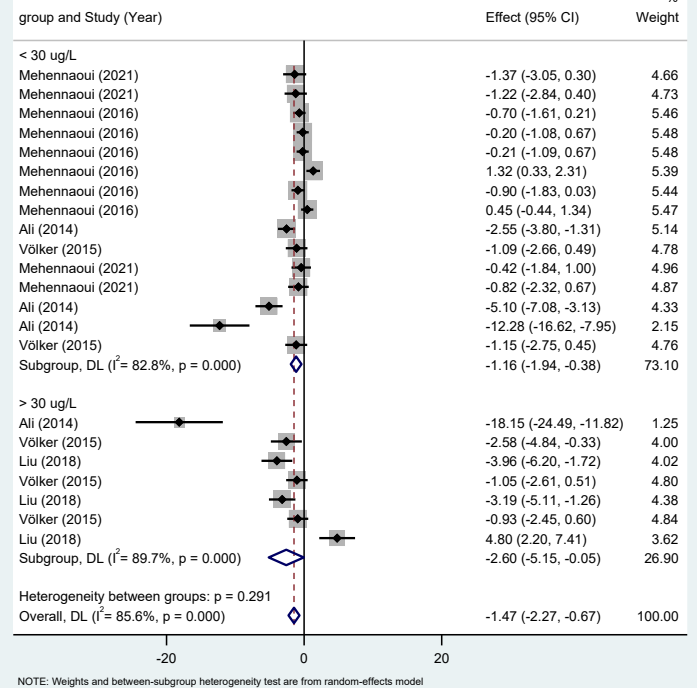

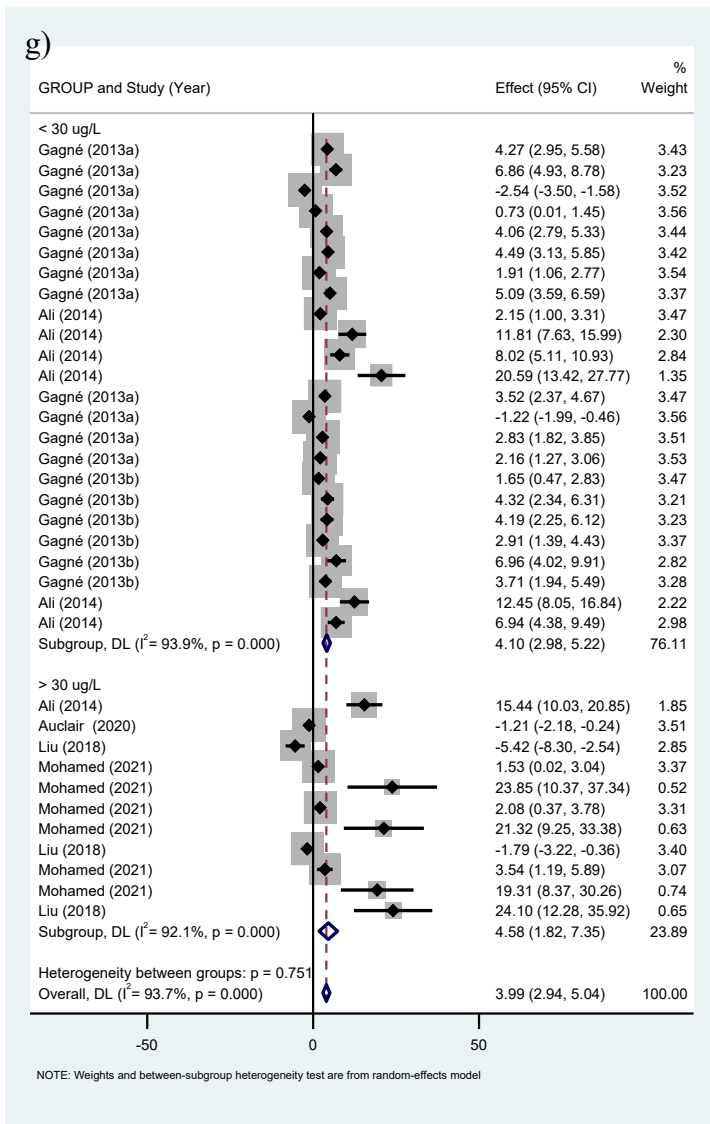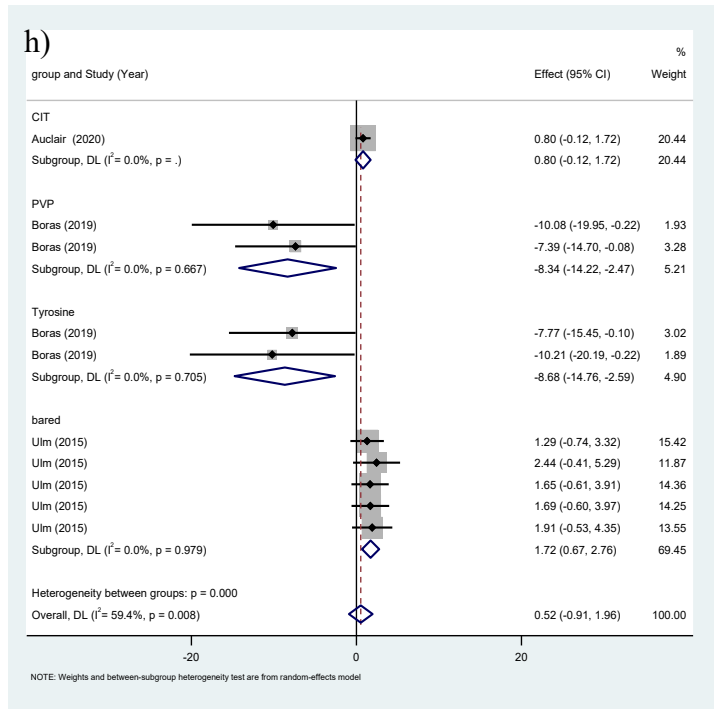

**Fig.S1** Meta-analysis of a) ROS; b) SOD; c) CAT; d) GST; e) GSH; f) GPx; g) LPO; and h) AChE in freshwater invertebrates. The dot represents the effect size of each study. The line through the dot represents 95%CI of the effect size. The square represents the weight,  $W*i$ . The bigger the square, the bigger the weight. The broken line represents the effect size and the horizontal length of the diamond, the 95%CI of the effect size for all studies combined.

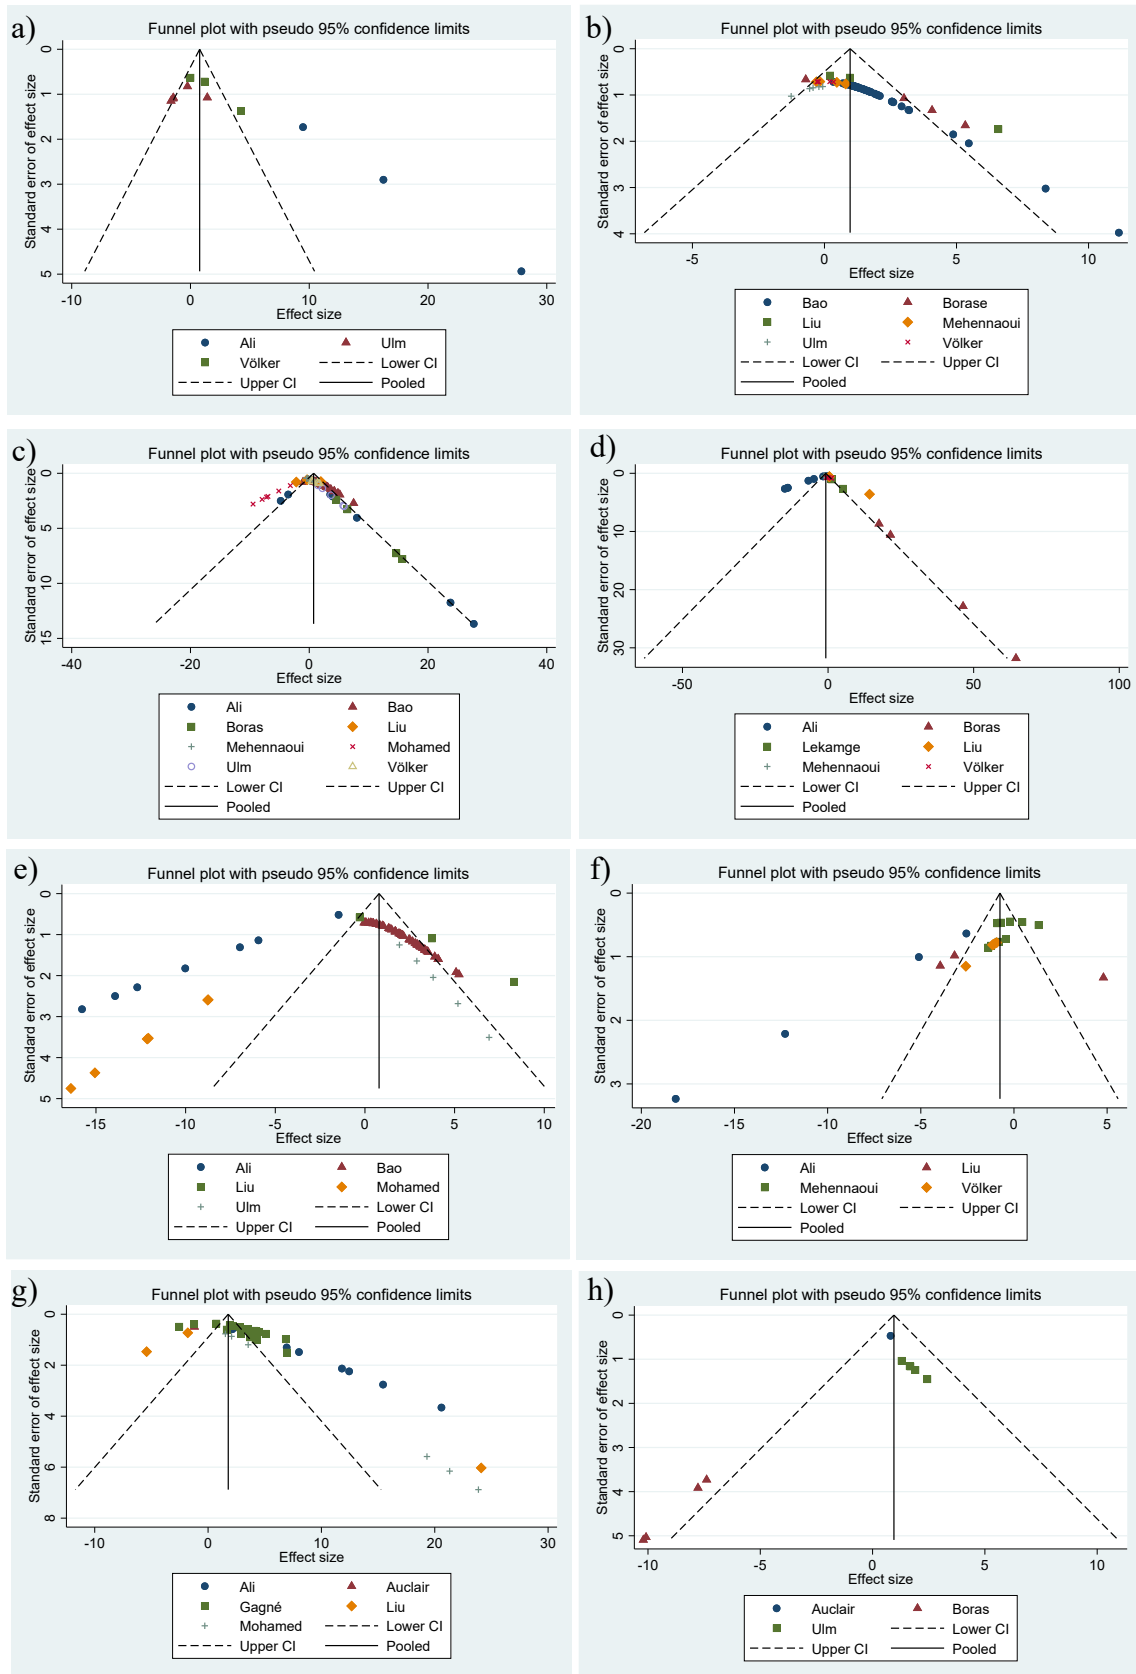

**Fig.S2** Funnel plots of a) ROS; b) SOD; c) CAT; d) GST; e) GSH; f) GPx; g) LPO; and h) AChE for experimental studies included in meta-analysis.

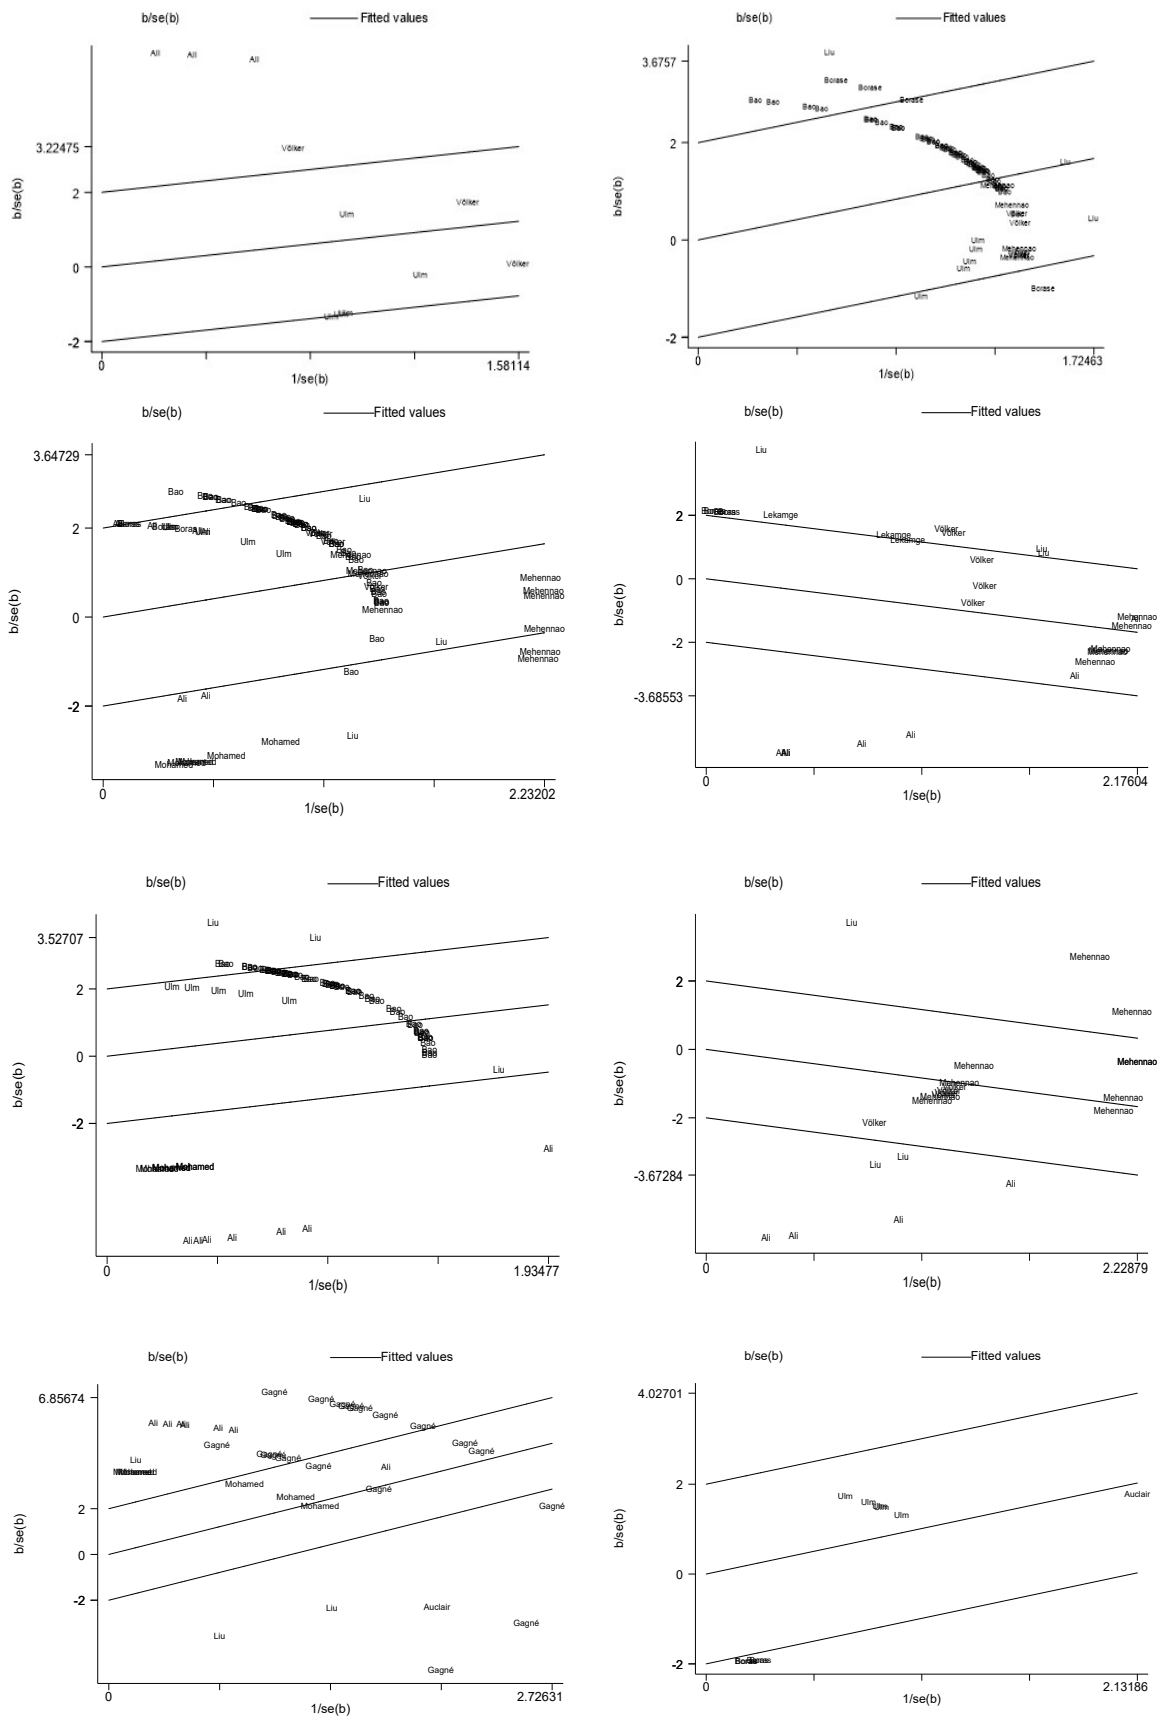

**Fig.S3.** Sensitivity analysis of a) ROS; b) SOD; c) CAT; d) GST; e) GSH; f) GPx; g) LPO; and h) AChE for experimental studies included in meta-analysis.

**Table S1.** Meta aggression analyses according to different factors for biomarkers.

| Heterogeneous factor           | p (95% Conf. Interval)     |                            |                            |                           |
|--------------------------------|----------------------------|----------------------------|----------------------------|---------------------------|
|                                | ROS                        | SOD                        | CAT                        | GST                       |
| <b>Size</b>                    | 0.002 (0.409~1.382)        | 0.428 (-0.007~0.017)       | 0.040 (0.001~0.043)        | 0.113 (-0.549~0.062)      |
| <b>Conc.</b>                   | 0.965 (-0.219~0.228)       | 0.028 (0.000~0.004)        | 0.398 (-0.003~0.001)       | 0.031 (0.001~0.015)       |
| <b>Time</b>                    | 0.009 (0.068~0.364)        | 0.000 (0.002~0.006)        | 0.078 (-0.000~0.007)       | 0.235 (-0.005~0.020)      |
| <b>Coating*</b>                | /                          | 0.169 (-0.65~0.117)        | 0.874 (-0.821~0.700)       | 0.044 (0.042~0.030)       |
| <b>Size*Conc.</b>              | 0.436 (-0.009~0.019)       | 0.022 (0.000~0.000)        | 0.611 (-0.000~0.000)       | 0.036 (0.000~0.001)       |
| <b>Size*Time</b>               | 0.002 (0.003~0.009)        | 0.127 (-7.09e-06~0.000)    | 0.137 (-0.000~0.000)       | 0.332 (-0.000~0.001)      |
| <b>Size*Coating</b>            | /                          | 0.494 (-0.010~0.005)       | 0.911 (-0.010~0.011)       | 0.015 (0.022~0.190)       |
| <b>Size*Conc.*Time*Coating</b> | 0.004 (0.000~0.000)        | 0.035 (7.47e-09~1.98e-07)  | 0.803 (-6.41e-08~8.25e-08) | 0.028 (4.93e-08~8.06e-07) |
|                                | GPx                        | GSH                        | LPO                        | AChE                      |
| <b>Size</b>                    | 0.155 (-0.559~0.097)       | 0.214 (-0.018~0.080)       | 0.403 (-0.116~0.048)       | 0.450 (-0.370~0.180)      |
| <b>Conc.</b>                   | 0.125 (-0.001~0.0069)      | 0.583 (-0.004~0.006)       | 0.061 (-0.000~0.0160)      | 0.519 (-0.150~0.269)      |
| <b>Time</b>                    | 0.644 (-0.010~0.016)       | 0.000 (0.017~0.036)        | 0.886 (-0.027~0.031)       | 0.698 (-0.176~0.250)      |
| <b>Coating</b>                 | 0.525 (-1.22~2.31)         | 0.243 (-2.39~9.26)         | 0.261 (-4.11~0.152)        | 0.048 (-3.61~0.020)       |
| <b>Size*Conc.</b>              | 0.131 (-0.000~0.000)       | 0.096 (-0.000~0.000)       | 0.113 (-0.000~0.006)       | 0.631 (-0.003~0.005)      |
| <b>Size*Time</b>               | 0.721 (-0.000~0.000)       | 0.015 (0.000~0.000)        | 0.494 (-0.001~0.001)       | 0.929 (-0.003~0.003)      |
| <b>Size*Coating</b>            | 0.726 (-0.032~0.045)       | 0.243 (-2.39~9.26)         | 0.366 (-0.050~0.019)       | 0.151 (-0.070~0.013)      |
| <b>Size*Conc.*Time*Coating</b> | 0.123 (-4.77e-08~3.73e-07) | 0.064 (-1.57e-08 5.23e-07) | 0.136 (-1.16e-07~8.13e-07) | 0.687 (-0.000~0.000)      |



**Table S2.** Subgroup analyses of the meta-analysis according to different factors for biomarkers

| Subgroup measurement |                | df          | <i>p</i> | <i>I</i> <sup>2</sup> (%) | SMD [95% Conf. Interval] | df         | <i>p</i> | <i>I</i> <sup>2</sup> (%) | SMD [95% Conf. Interval] |
|----------------------|----------------|-------------|----------|---------------------------|--------------------------|------------|----------|---------------------------|--------------------------|
| <b>Size</b>          | < 30 nm        | 7.00        | 0.01     | 64.00                     | 0.182 (-0.91~1.27)       | 50         | < 0.001  | 72.0                      | 0.68 (0.21~1.14)         |
|                      | > 30 nm        | 2.00        | < 0.001  | 86.10                     | 16.86 (7.86~25)          | 36         | < 0.001  | 44.8                      | 1.73 (1.22~2.23)         |
|                      | Overall        | 10.00       | < 0.001  | 90.60                     | 3.01 (0.84~5.19)         | 87         | < 0.001  | 77.8                      | 1.10 (0.74~1.47)         |
| <b>Conc.</b>         |                | <b>ROS</b>  |          |                           |                          | <b>CAT</b> |          |                           |                          |
|                      | < 30 ug/L      | 17          | < 0.001  | 85.1                      | -2.06 (-3.03~-1.09)      | 14         | < 0.001  | 82.8                      | -1.16 (-1.94~-0.38)      |
|                      | ≥ 30 ug/L      | 9           | < 0.001  | 83.4                      | 0.62 (-0.88~2.11)        | 6          | < 0.001  | 89.7                      | -2.60 (-5.15~-0.05)      |
|                      | Overall        | 27          | < 0.001  | 86.5                      | -1.12 (-1.98~-0.26)      | 21         | < 0.001  | 85.6                      | -1.47 (-2.27~-0.67)      |
|                      |                | <b>GST</b>  |          |                           |                          | <b>GPx</b> |          |                           |                          |
|                      |                | 23          | < 0.001  | 93.9                      | 4.10 (2.98~5.22)         |            |          |                           |                          |
|                      | ≥ 30 ug/L      | 10          | < 0.001  | 92.1                      | 4.58 (1.82~7.35)         |            |          |                           |                          |
|                      | Overall        | 34          | < 0.001  | 93.7                      | 3.99 (2.94~5.04)         |            |          |                           |                          |
| <b>Time</b>          |                | <b>SOD</b>  |          |                           |                          | <b>GSH</b> |          |                           |                          |
|                      | < 14 d         | 13          | 0.003    | 58.8                      | 0.29 (-0.40~0.98)        | 17         | < 0.001  | 93.6                      | -2.82 (-3.49~-2.14)      |
|                      | 14 d           | 53          | 0.19     | 14.3                      | 1.27 (1.01~1.52)         | 50         | < 0.001  | 58.2                      | 1.55 (1.29~1.80)         |
|                      | Overall        | 67          | < 0.001  | 41.3                      | 1.10 (0.83~1.38)         | 68         | < 0.001  | 87.4                      | 1.00 (0.76~1.24)         |
| <b>Coating</b>       |                | <b>AChE</b> |          |                           |                          |            |          |                           |                          |
|                      | CIT            | 0           |          | 0                         | 0.80 (-0.12~1.72)        |            |          |                           |                          |
|                      | PVP            | 1           | 0.667    | 0                         | -8.34 (-14.22~-2.47)     |            |          |                           |                          |
|                      | Tyrosine bared | 1           | 0.705    | 0                         | -8.68 (-14.76~-2.59)     |            |          |                           |                          |
|                      | Overall        | 4           | 0.979    | 0                         | 1.72 (0.67~2.76)         |            |          |                           |                          |
|                      | Overall        | 9           | 0.008    | 59.4                      | 0.52 (-0.91~1.96)        |            |          |                           |                          |
